# Supplementary material for: The Genetic Basis for Salivary Gland Barriers to Arboviral Transmission
Source: MDPI journal article supplement (doi:10.3390/insects12010073), 2021-01-15
Supplement: s1 [file s1]

**Table S1.** Quantitative genetic analysis of SGIB in *Aedes aegypti*.

| DENV2Qro94              |          |         |         |         | DENV2 Guerrero C932 |        |         |         | DENV2 Merida BC17 |        |         |         |
|-------------------------|----------|---------|---------|---------|---------------------|--------|---------|---------|-------------------|--------|---------|---------|
|                         | American |         |         |         | Asian               |        |         |         | Cosmopolitan      |        |         |         |
|                         | Estimate | Error   | z-value | Prob>z  | Estimate            | Error  | z-value | Prob>z  | Estimate          | Error  | z-value | Prob>z  |
| $\sigma^2_s$            | 0.2700   | 0.0975  | 2.7700  | 0.0028  | 0.1029              | 0.0567 | 1.8100  | 0.0348  | 0.0082            | 0.0179 | 0.4600  | 0.3238  |
| $\sigma^2_d$            | 0.0479   | 0.0300  | 1.5900  | 0.0555  | 0.12                | 0.0382 | 3.1400  | <0.0001 | 0.0833            | 0.0264 | 3.1600  | 0.0008  |
| $\sigma^2_w$            | 1.0149   | 0.0546  | 18.6000 | <0.0001 | 0.4869              | 0.0762 | 17.6300 | <0.0001 | 0.3875            | 0.0219 | 17.7100 | <0.0001 |
| $\sigma^2_p$            | 1.3328   |         |         |         | 0.7098              |        |         |         | 0.4789            |        |         |         |
| Va                      | 1.0800   |         |         |         | 0.4116              |        |         |         | 0.0328            |        |         |         |
| Vd                      | -0.2221  |         |         |         | 0.0171              |        |         |         | 0.0751            |        |         |         |
| Ve                      | 0.4749   |         |         |         | 0.2811              |        |         |         | 0.3711            |        |         |         |
| Vp                      | 1.3328   |         |         |         | 0.7098              |        |         |         | 0.7489            |        |         |         |
| h <sup>2</sup>          | 0.8103   |         |         |         | 0.5799              |        |         |         | 0.0685            |        |         |         |
| prob h <sup>2</sup> = 0 | 5.34E-07 |         |         |         | 0.0072              |        |         |         | 0.3274            |        |         |         |
| CHIKV LR2006 OPY-1      |          |         |         |         | CHIKV R99659        |        |         |         |                   |        |         |         |
|                         | ECSA-IOL |         |         |         | Asian               |        |         |         |                   |        |         |         |
|                         | Estimate | Error   | z-value | Prob>z  | Estimate            | Error  | z-value | Prob>z  |                   |        |         |         |
| $\sigma^2_s$            | 0.0337   | 0.0131  | 2.5800  | 0.005   | 0.0012              | 0.0102 | 0.1200  | 0.4537  |                   |        |         |         |
| $\sigma^2_d$            | 0.0017   | 0.0049  | 0.3400  | 0.3562  | 0.0072              | 0.0128 | 0.5600  | 0.2882  |                   |        |         |         |
| $\sigma^2_w$            | 0.2248   | 0.0127  | 17.7500 | <0.0001 | 0.1155              | 0.0204 | 5.6700  | <0.0001 |                   |        |         |         |
| $\sigma^2_p$            | 0.2601   |         |         |         | 0.1238              |        |         |         |                   |        |         |         |
| Va                      | 0.1346   |         |         |         | 0.0048              |        |         |         |                   |        |         |         |
| Vd                      | -0.0320  |         |         |         | 0.006               |        |         |         |                   |        |         |         |
| Ve                      | 0.1575   |         |         |         | 0.1131              |        |         |         |                   |        |         |         |
| Vp                      | 0.2601   |         |         |         | 0.1238              |        |         |         |                   |        |         |         |
| h <sup>2</sup>          | 0.5174   |         |         |         | 0.0385              |        |         |         |                   |        |         |         |
| prob h <sup>2</sup> =0  | 6.20E-06 |         |         |         | 0.5000              |        |         |         |                   |        |         |         |
| ZIKV PRVABC59           |          |         |         |         | ZIKV Dakar          |        |         |         |                   |        |         |         |
|                         | Asian    |         |         |         | African             |        |         |         |                   |        |         |         |
|                         | Estimate | Error   | z-value | Prob>z  | Estimate            | Error  | z-value | Prob>z  |                   |        |         |         |
| $\sigma^2_s$            | 0.0077   | 0.00558 | 1.3300  | 0.0918  | 0.0762              | 0.343  | 2.2200  | 0.0133  |                   |        |         |         |
| $\sigma^2_d$            | 0.0219   | 0.0072  | 3.05    | 0.0012  | 0.0466              | 0.0159 | 3.05    | 0.0011  |                   |        |         |         |
| $\sigma^2_w$            | 0.1719   | 0.009   | 19.11   | <0.0001 | 0.1859              | 0.011  | 16.84   | <0.0001 |                   |        |         |         |
| $\sigma^2_p$            | 0.2015   |         |         |         | 0.3106              |        |         |         |                   |        |         |         |
| Va                      | 0.0307   |         |         |         | 0.0305              |        |         |         |                   |        |         |         |
| Vd                      | 0.0142   |         |         |         | -0.0276             |        |         |         |                   |        |         |         |
| Ve                      | 0.1565   |         |         |         | 0.0336              |        |         |         |                   |        |         |         |
| Vp                      | 0.2015   |         |         |         | 0.3106              |        |         |         |                   |        |         |         |
| h <sup>2</sup>          | 0.1526   |         |         |         | 0.9808              |        |         |         |                   |        |         |         |
| prob h <sup>2</sup> = 0 | 4.16E-02 |         |         |         | 0.0009              |        |         |         |                   |        |         |         |

**Table S2.** Quantitative genetic analysis of SGEb in *Aedes aegypti*.

| DENV2Qro94<br>American         |               |        |         |         | DENV2 Guerrero C932<br>Asian |        |         |         | DENV2 Merida BC17<br>Cosmopolitan |        |         |         |
|--------------------------------|---------------|--------|---------|---------|------------------------------|--------|---------|---------|-----------------------------------|--------|---------|---------|
|                                | Estimate      | Error  | z-value | Prob>z  | Estimate                     | Error  | z-value | Prob>z  | Estimate                          | Error  | z-value | Prob>z  |
| $\sigma^2_s$                   | 0.0287        | 0.0283 | 1.0100  | 0.1552  | 0.011                        | 0.0127 | 0.8600  | 0.1945  | 0.0258                            | 0.0235 | 1.1000  | 0.136   |
| $\sigma^2_d$                   | 0.0015        | 0.0353 | 0.0400  | 0.4829  | 0.0000                       | 0.0000 | 0.0000  | 0.0000  | 0.0319                            | 0.0263 | 1.2100  | 0.1126  |
| $\sigma^2_w$                   | 0.3300        | 0.0511 | 6.4600  | <0.0001 | 0.2631                       | 0.0283 | 9.2900  | <0.0001 | 0.2996                            | 0.0289 | 10.4700 | <0.0001 |
| $\sigma^2_p$                   | 0.3602        |        |         |         | 0.2741                       |        |         |         | 0.3573                            |        |         |         |
| Va                             | 0.1148        |        |         |         | 0.0438                       |        |         |         | 0.1032                            |        |         |         |
| Vd                             | -0.0272       |        |         |         | -0.011                       |        |         |         | 0.0061                            |        |         |         |
| Ve                             | 0.2726        |        |         |         | 0.2412                       |        |         |         | 0.2480                            |        |         |         |
| Vp                             | 0.3602        |        |         |         | 0.2741                       |        |         |         | 0.3573                            |        |         |         |
| h <sup>2</sup>                 | <b>0.3186</b> |        |         |         | <b>0.1600</b>                |        |         |         | <b>0.2888</b>                     |        |         |         |
| prob h <sup>2</sup> = 0        | 0.1271        |        |         |         | 0.1855                       |        |         |         | 0.1103                            |        |         |         |
| CHIKV LR2006 OPY-1<br>ECSA-IOL |               |        |         |         | CHIKV R99659<br>Asian        |        |         |         |                                   |        |         |         |
|                                | Estimate      | Error  | z-value | Prob>z  | Estimate                     | Error  | z-value | Prob>z  |                                   |        |         |         |
| $\sigma^2_s$                   | 0.0914        | 0.0423 | 2.1600  | 0.0154  | 0.1025                       | 0.052  | 1.9700  | 0.0242  |                                   |        |         |         |
| $\sigma^2_d$                   | 0.0649        | 0.0256 | 2.5300  | 0.0057  | 0.1024                       | 0.0381 | 2.6900  | 0.0036  |                                   |        |         |         |
| $\sigma^2_w$                   | 0.6363        | 0.0347 | 18.3400 | <0.0001 | 0.7328                       | 0.0414 | 17.7200 | <0.0001 |                                   |        |         |         |
| $\sigma^2_p$                   | 0.7926        |        |         |         | 0.9377                       |        |         |         |                                   |        |         |         |
| Va                             | 0.3655        |        |         |         | 0.41                         |        |         |         |                                   |        |         |         |
| Vd                             | -0.0265       |        |         |         | -0.0001                      |        |         |         |                                   |        |         |         |
| Ve                             | 0.4536        |        |         |         | 0.5278                       |        |         |         |                                   |        |         |         |
| Vp                             | 0.7926        |        |         |         | 0.9377                       |        |         |         |                                   |        |         |         |
| h <sup>2</sup>                 | <b>0.4611</b> |        |         |         | <b>0.4372</b>                |        |         |         |                                   |        |         |         |
| prob h <sup>2</sup> = 0        | 0.0004        |        |         |         | 0.0001                       |        |         |         |                                   |        |         |         |
| ZIKV PRVABC59<br>Asian         |               |        |         |         | ZIKV Dakar<br>African        |        |         |         |                                   |        |         |         |
|                                | Estimate      | Error  | z-value | Prob>z  | Estimate                     | Error  | z-value | Prob>z  |                                   |        |         |         |
| $\sigma^2_s$                   | 0.0839        | 0.0397 | 2.1100  | 0.1730  | 0.1569                       | 0.1118 | 1.4000  | 0.0804  |                                   |        |         |         |
| $\sigma^2_d$                   | 0.0710        | 0.0292 | 2.3800  | 0.0086  | 0.3233                       | 0.1017 | 3.1800  | 0.0007  |                                   |        |         |         |
| $\sigma^2_w$                   | 0.8664        | 0.0457 | 18.96   | <0.0001 | 1.0675                       | 0.0634 | 16.8400 | <0.0001 |                                   |        |         |         |
| $\sigma^2_p$                   | 1.0213        |        |         |         | 1.5476                       |        |         |         |                                   |        |         |         |
| Va                             | 0.3356        |        |         |         | 0.6272                       |        |         |         |                                   |        |         |         |
| Vd                             | -0.0129       |        |         |         | -0.1665                      |        |         |         |                                   |        |         |         |
| Ve                             | 0.6986        |        |         |         | 0.7539                       |        |         |         |                                   |        |         |         |
| Vp                             | 1.0213        |        |         |         | 1.5476                       |        |         |         |                                   |        |         |         |
| h <sup>2</sup>                 | <b>0.3286</b> |        |         |         | <b>0.4050</b>                |        |         |         |                                   |        |         |         |
| prob h <sup>2</sup> = 0        | 0.0002        |        |         |         | 0.0830                       |        |         |         |                                   |        |         |         |
